# Supplementary material for: Rapid decline in the susceptibility of Plasmodium falciparum to dihydroartemisinin–piperaquine in the south of Vietnam
Source: Springer Nature journal article supplement (doi:10.1186/s12936-017-1680-8), 2017-01-13
Supplement: 12936_2017_1680_MOESM1_ESM.pdf [file 12936_2017_1680_MOESM1_ESM.pdf]

**Additional File 1: The number of DP tablets administered to patients according to body weight.**

| <b>Body weight</b> | <b>Day 0 (at 0 and 8h)</b> | <b>Day 1 (at 24h)</b> | <b>Day 2 (at 48h)</b> |
|--------------------|----------------------------|-----------------------|-----------------------|
| ≥35 kg             | 2.0 - 2.0                  | 2.0                   | 2.0                   |
| 25–34 kg           | 1.5 - 1.5                  | 1.5                   | 1.5                   |
| 15–24 kg           | 1.0 - 1.0                  | 1.0                   | 1.0                   |
| <15 kg             | 0.5 - 0.5                  | 0.5                   | 0.5                   |
