# Supplementary material for: Rapid decline in the susceptibility of Plasmodium falciparum to dihydroartemisinin–piperaquine in the south of Vietnam
Source: Springer Nature journal article supplement (doi:10.1186/s12936-017-1680-8), 2017-01-13
Supplement: MOESM2 [file 11998474]

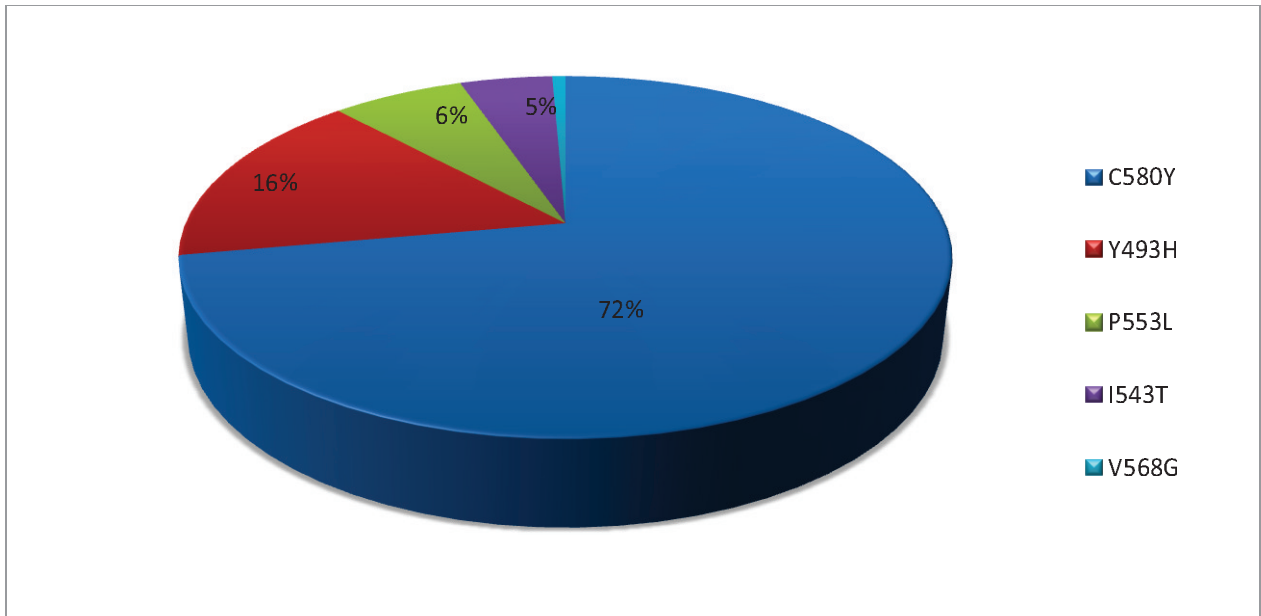

**Additional File 2: Proportion of K13 propeller mutations in the study population.**
